# Supplementary material
Source: PubMed Central journal article supplement (PMC4111783)

# Legend

-  < 4 ED visits
-  Routine Psychosocial Services
-  Routine Psychotherapy
-  Routine Psychiatric Care
-  Any AP Use
-  < 3 Inpatient Admits & < 30 Inpatient Days
-  Post dx Follow-up < 8 Days
-  Post dx Follow-up < 31 Days
-  Any Clozapine Use
-  No AP Polypharmacy
-  LAI AP Use
-  >80% AP Adherent
-  >50% AP Adherent
-  Adequate Clozapine Treatment

California

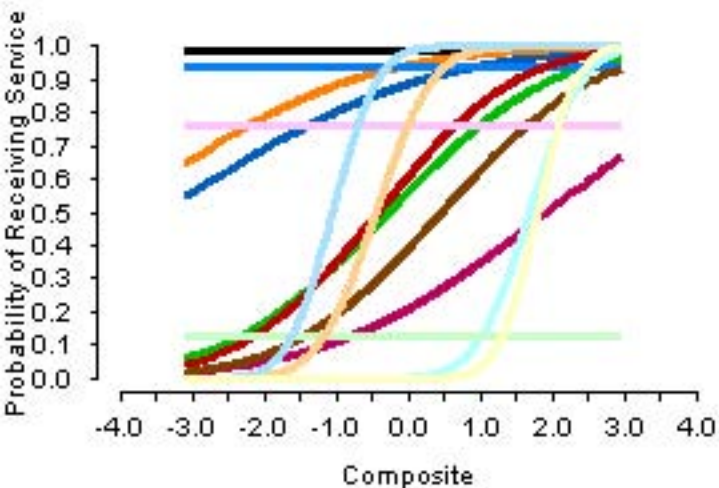

Florida

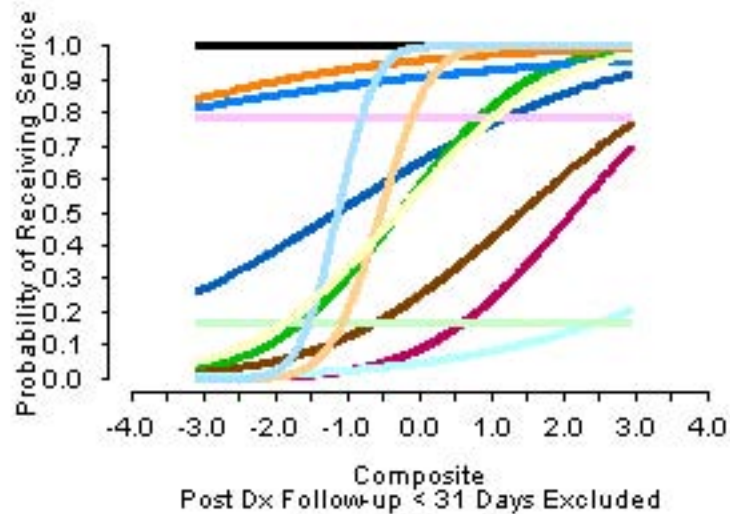

New York

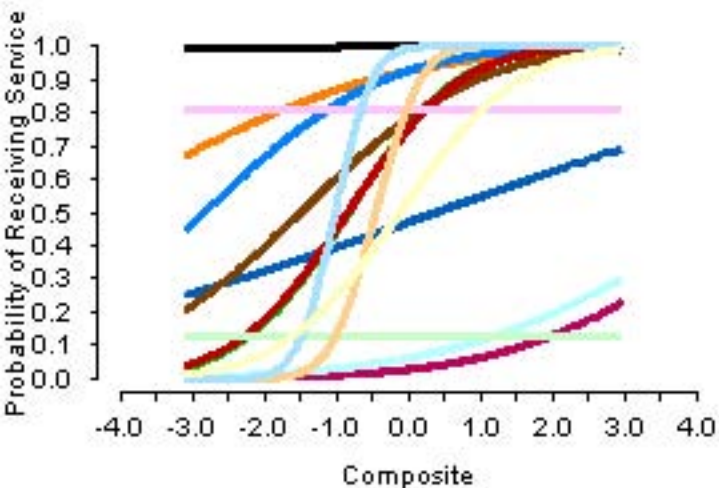

North Carolina

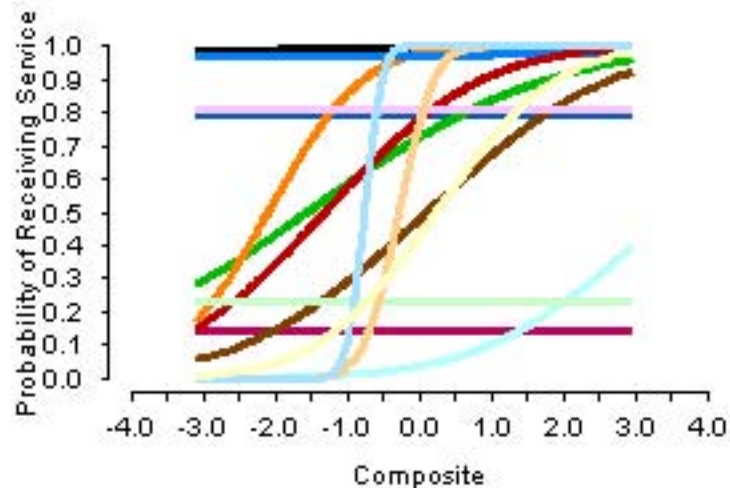

California

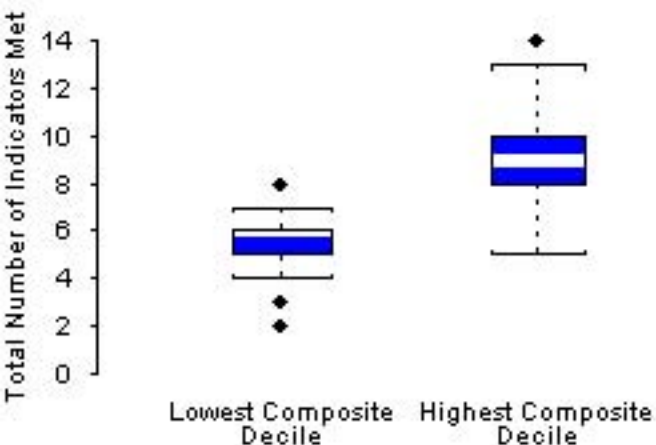

Florida

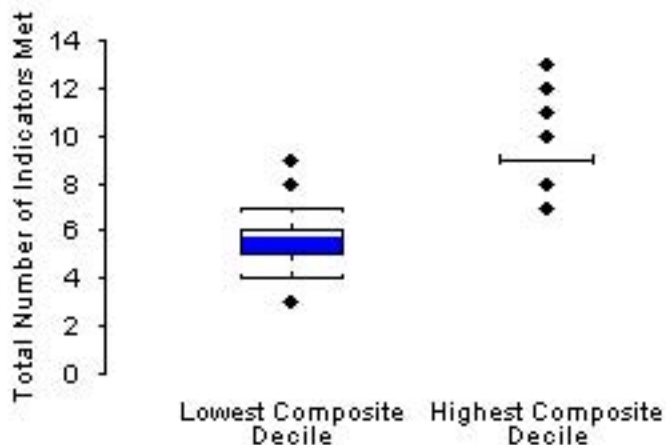

New York

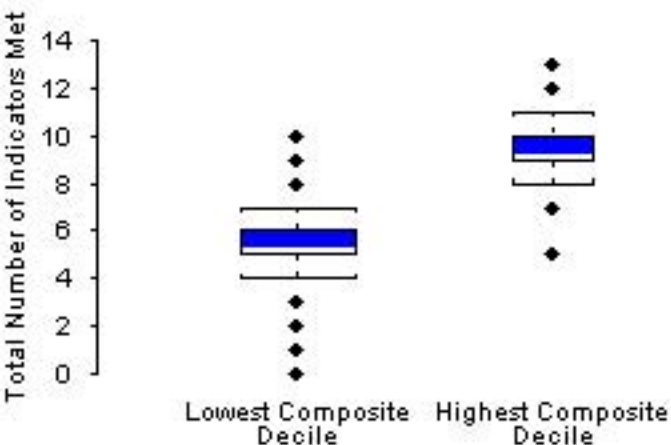

North Carolina

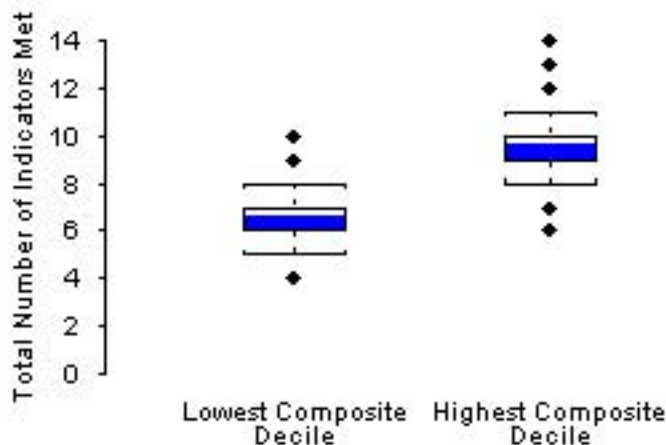

Supplement: NIHMS561252-supplement-Supp_Figure_A1-2.pdf [file NIHMS561252-supplement-Supp_Figure_A1-2.pdf]
